# Supplementary material
Source: MDPI journal article supplement (https://www.mdpi.com/2076-3298/9/3/35)
Supplement: s1 [file s1]

# 1 Supplementary Material

Table S1: Changes in various LOWESS-smoothed weather records, 1890-2019.

|                                     | Annual     | Winter    | Spring    | Summer     | Autumn    |
|-------------------------------------|------------|-----------|-----------|------------|-----------|
| <b>Annual and Seasonal Weather</b>  |            |           |           |            |           |
| <b>Maximum Temperature (°C)</b>     | 1.3±0.2    | 1.7±0.3   | 0.7±0.5   | 0.8±0.2    | 1.5±0.4   |
| <b>DTR (°C)</b>                     | -1.0±0.2   | -1.3±0.4  | -1.2±0.3  | -0.4±0.3   | -0.2±0.3  |
| <b>Minimum Temperature (°C)</b>     | 2.3±0.2    | 3.0±0.5   | 2.0±0.4   | 1.5±0.2    | 1.8±0.3   |
| <b>Rainfall (mm)</b>                | 46.3±35.3  | 21.5±8.1  | 20.6±28.0 | -42.4±23.1 | 58.3±10.2 |
| <b>Snowfall (cm)</b>                | -20.1±18.2 | -24.9±9.6 | 2.8±6.2   | —          | 2.5±3.4   |
| <b>Growing season days</b>          | 23.3±4.2   | —         | —         | —          | —         |
| <b>Frost-free days</b>              | 12.7±3.0   | —         | —         | —          | —         |
| <b>Extreme Weather</b>              |            |           |           |            |           |
| <b>Maximum Temperature (events)</b> | —          | 0.4±0.6   | 2.8±0.4   | 1.3±0.4    | 0.6±0.7   |
| <b>Minimum Temperature (events)</b> | —          | -0.9±0.5  | -0.5±0.9  | -1.0±0.4   | -1.9±0.5  |
| <b>Rainfall (events)</b>            | —          | -0.3±0.2  | 0.0±0.4   | -0.3±0.5   | 1.5±0.3   |
| <b>Snowfall (events)</b>            | —          | -1.3±0.5  | 0.3±0.1   | —          | 0.0±0.0   |

Table S2: Slopes for seasonal temperature comparisons ( $\Delta T$ ) between Ottawa, ON, and each of Belleville, ON, Morrisburg, ON, and Chelsea, QC maximum and minimum temperature time series. Slopes are in  $\Delta^\circ\text{C}/\text{year}$ , values indicating an significant difference between slopes ( $p < 0.05$ ) are highlighted in yellow. Positive values indicate Ottawa's seasonal temperature time series has a more positive rate of change than the corresponding comparative.

|                            | Winter | Spring | Summer  | Autumn  |
|----------------------------|--------|--------|---------|---------|
| <b>Maximum Temperature</b> |        |        |         |         |
| <b>Ottawa – Belleville</b> | 0.0103 | 0.0043 | 0.0049  | 0.0070  |
| <b>Ottawa – Morrisburg</b> | 0.0143 | 0.0044 | -0.0014 | 0.0142  |
| <b>Ottawa – Chelsea</b>    | 0.0128 | 0.0031 | -0.0048 | 0.0094  |
| <b>Minimum Temperature</b> |        |        |         |         |
| <b>Ottawa – Belleville</b> | 0.0134 | 0.0036 | 0.0045  | 0.0007  |
| <b>Ottawa – Morrisburg</b> | 0.0240 | 0.0102 | -0.0020 | -0.0023 |
| <b>Ottawa – Chelsea</b>    | 0.0102 | 0.0027 | 0.0238  | 0.0214  |

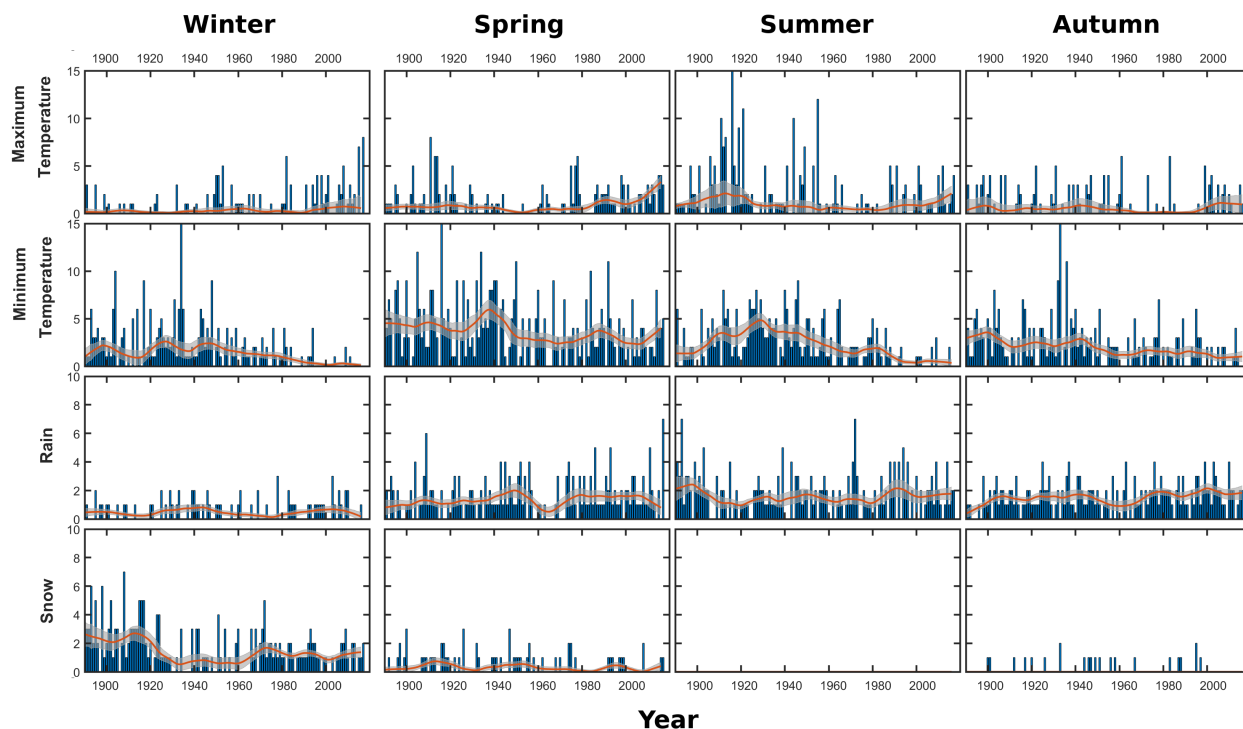

Figure S1: Smoothed (LOWESS, span= $0.15 \pm 95\%$ ) bar graphs for the seasonal count of extreme weather events in Ottawa, ON.

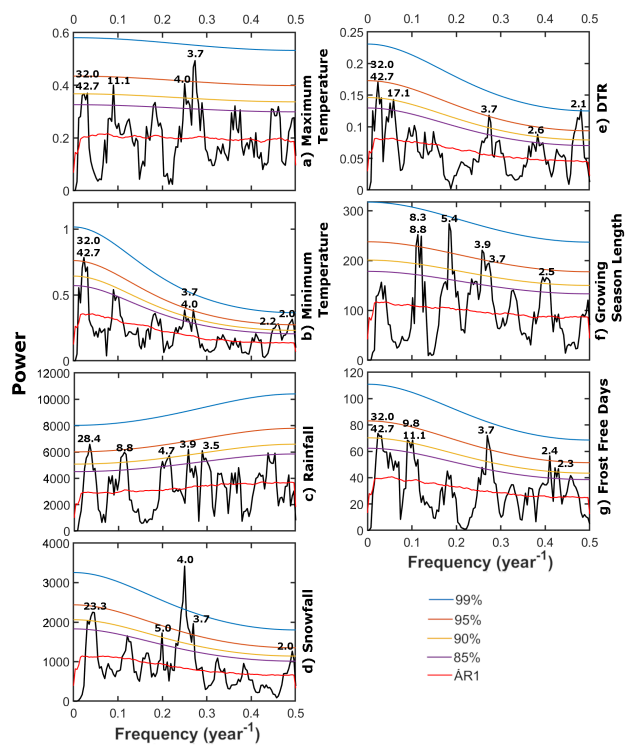

Figure S2: Spectral analysis of annual weather records with indicated red noise (AR1) and significance lines for Ottawa, ON.

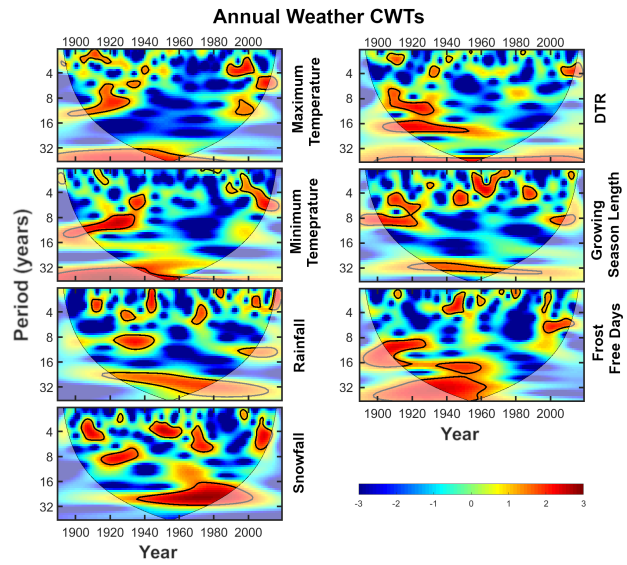

Figure S3: Continuous wavelet transforms (CWTs) of annual weather records for Ottawa, ON. Areas of high spectral density that are greater than the 90% confidence level are outlined in black.

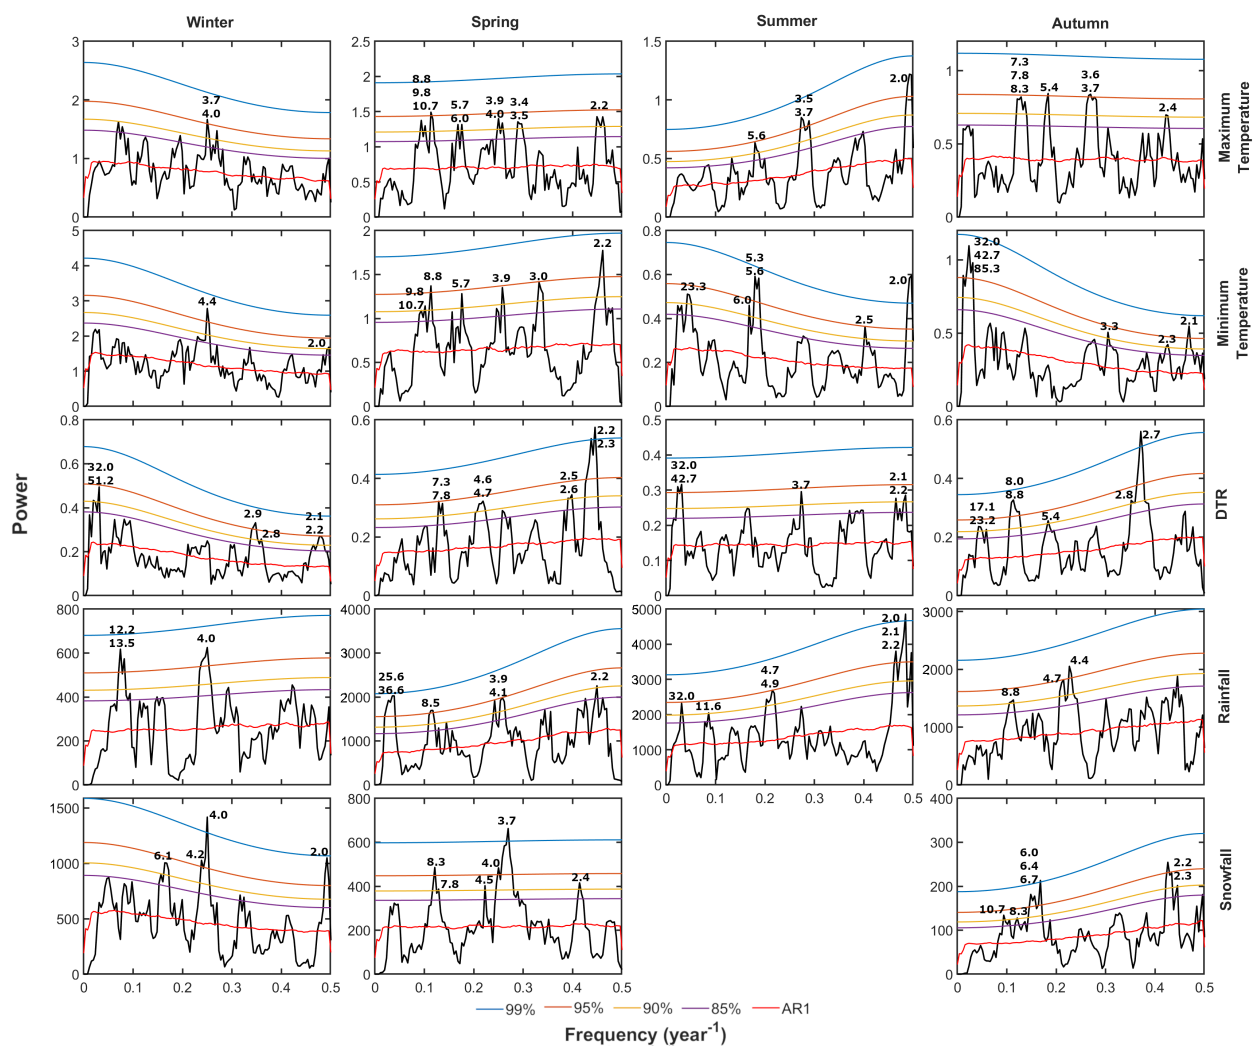

Figure S4: Spectral analysis of seasonal weather records with indicated red noise (AR1) and significance lines for Ottawa, ON.

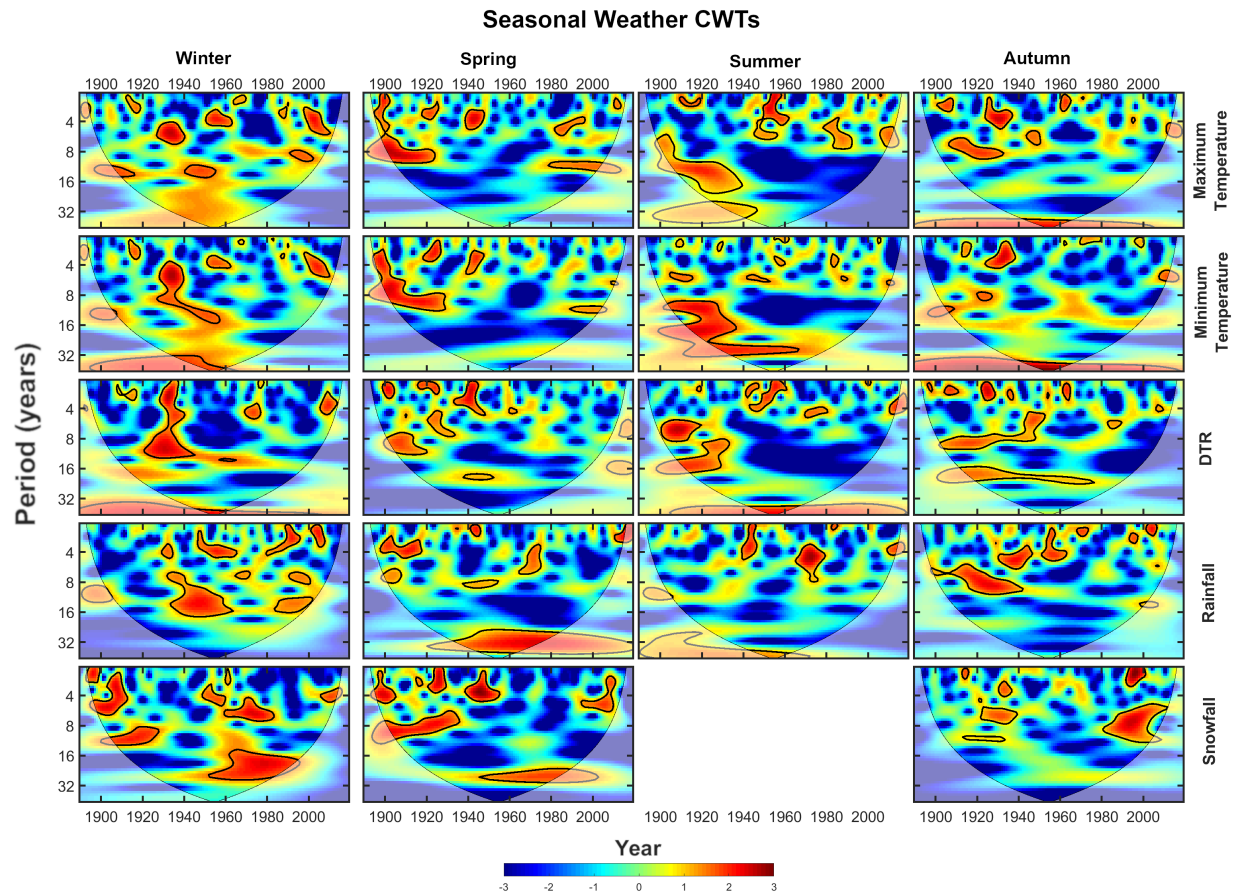

Figure S5: Continuous wavelet transforms (CWTs) of seasonal weather records for Ottawa, ON. Areas of high spectral density that are greater than the 90% confidence level are outlined in black.

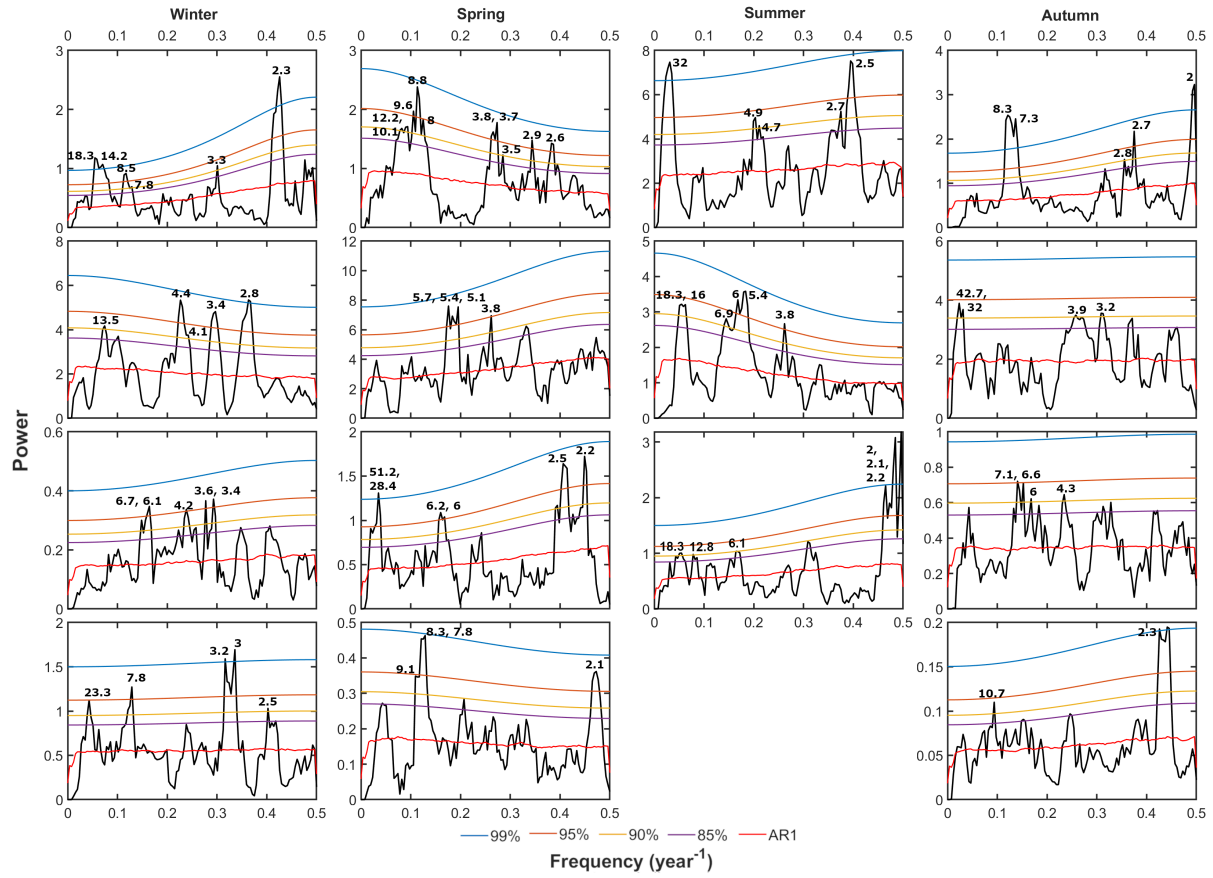

Figure S6: Spectral analysis of seasonal extreme weather records with indicated red noise (AR1) and significance lines for Ottawa, ON.

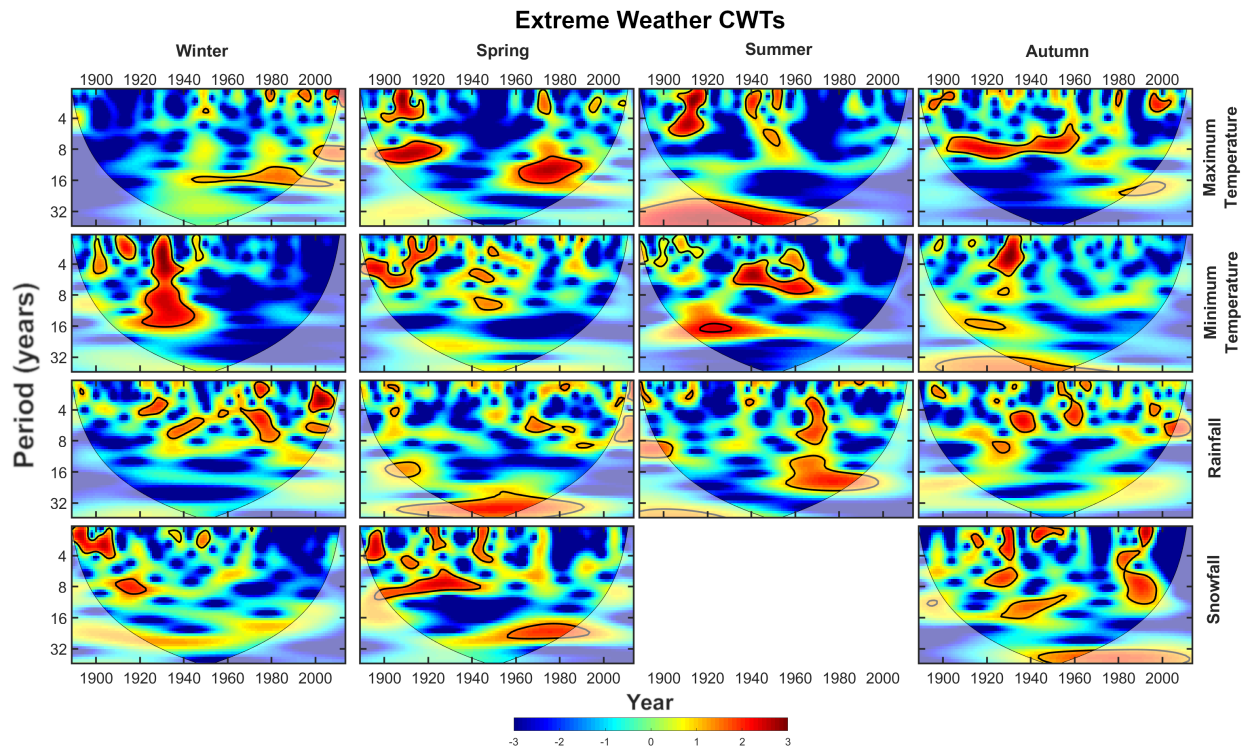

Figure S7: Continuous wavelet transforms (CWTs) of seasonal extreme weather records for Ottawa, ON. Areas of high spectral density that are greater than the 90% confidence level are outlined in black.
